# Supplementary material for: LiTaO3 microcubes: the layered structure and the increased Curie temperature
Source: Royal Society of Chemistry journal article supplement (doi:10.1039/c5ra03209a), 2015-01-01
Supplement: c5ra03209a1.pdf [file c5ra03209a1.pdf]

Supporting Information on

## **LiTaO<sub>3</sub> Microcubes: the Layered Structure and the Increased Curie Temperature**

By Xin Xin Gong, Ming Fang, Guang Tao Fei, Mao Liu, Fa Di Li, Guo Liang Shang,  
and Li De Zhang

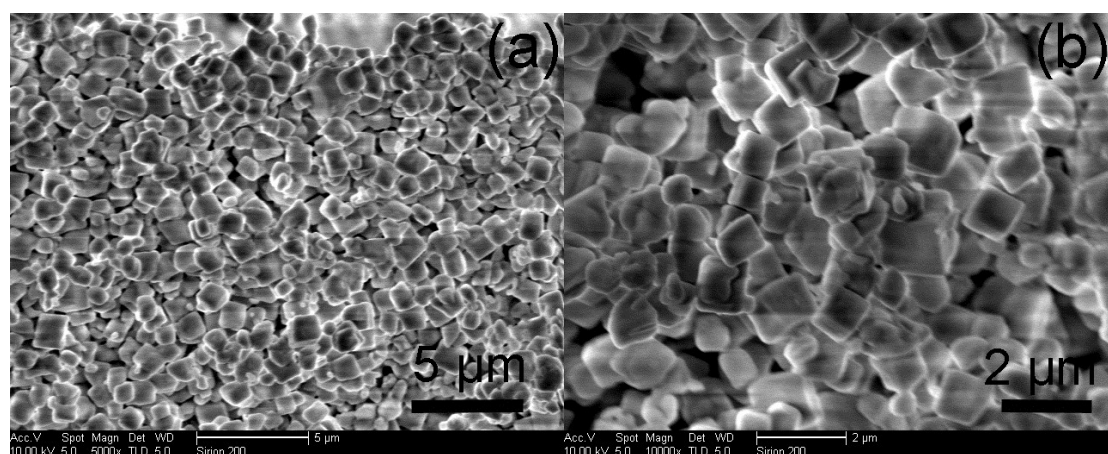

Figure SI-1. FESEM images of the sample after 1000 °C sintering.
